# Supplementary material for: Helical templating of polyiodide networks at a binuclear metallo complexElectronic supplementary information (ESI) available: synthetic details, crystal data (CCDC 198624 and 198625 in CIF format) and views of the C–H⋯I and H⋯I interactions between I62– and I3– and the cationic component in 2. See http://www.rsc.org/suppdata/cc/b2/b211743f/.
Source: Royal Society of Chemistry journal article supplement (doi:10.1039/b211743f), 2003-01-14
Supplement: b211743f.doc [file b211743f.doc]

**SUPPLEMENTARY DATA**


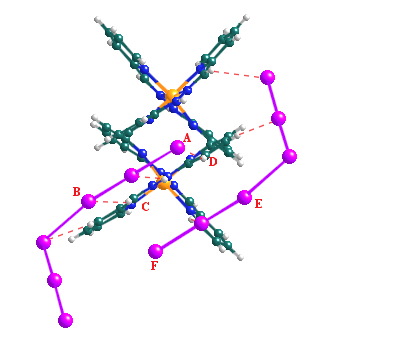

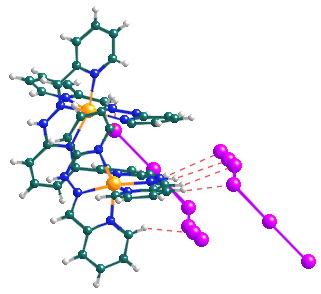


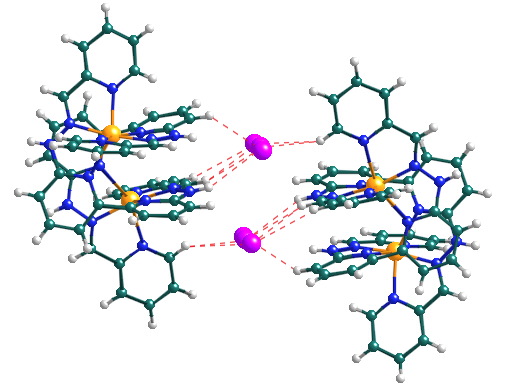
**Figure S1.** Two views of the C-H•••I interactions in **2** between the cations and the I­­62- fragment I(1)-I(6). The I•••H distances range from 3.07Å to 3.24 Å and the C-H•••I angles from 131.4° to 177.4°. The torsion angles A-B-C-D and C-D-E-F are 0.48° and 3.48° respectively.

**Figure S2:** A view of the C-H•••I interactions in **2** between two cations and two I­­3- fragments I7-I8-I9 in **2**. The •••H distances range from 3.19Å to 3.32Å and the C-H•••I angles from 130.9° to 148.5°.

*Synthesis:* The ligand L was prepared by reaction of 6,6’-dihydrazino-2,2’-bipyridine with 2 molar equivalents of pyridine-2-carboxaldehyde in methanol solution. [Ni2L2][BF4]4 was prepared by reaction of Ni(BF4)2.6H2O with one equivalent of ligand in acetonitrile solution, then precipitated using diethyl ether. Crystalline **1** was prepared by the slow diffusion of diethyl ether vapour into a reaction mixture of [Ni2(L)2][BF4]4 (6mg) with 20 mole equivalents of NaI and 30 mole equivalents of I2 in acetonitrile solution (2cm3). Crystalline **2** was prepared in the same manner, but with a fivefold increase in scale, *ie*. 30mg [Ni2L2][BF4]4 with 20 mole equivalents of NaI and 30 mole equivalents of I2 in acetonitrile solution (10cm3).

‡ *Crystal Data* for **1**: C26H24I12N10Ni, *M* = 2058.06, monoclinic, space group *C*2/*c* (no. 15), red-black irregular blocks, *a* = 13.497(2), *b* = 35.962(6), *c* = 20.498(4) Å,  = 108.127(3) º, *U* = 9456(3) Å3, Z = 8, *D*c = 2.891 g.cm-3, (Mo-*K*) = 8.278 mm-1, *T* = 150(2) K. 9308 unique reflections [*R*int = 0.117], 5350 with *I*>2(*I*). Final *R1* = 0.0949, *wR*2 (all data) = 0.239.

*Crystal Data* for **2**: C48H42I13N18Ni2, *M* = 2638.12, triclinic, space group *P*-1 (no. 2), dark red sphenoids, *a* = 13.429(1), *b* = 15.266(1), *c* = 18.172(1) Å,  = 79.363(1),  = 86.971(1),  = 73.100(1)º, *U* = 3503(1) Å3, Z = 2, *D*c = 2.501 gcm-3, (Mo-*K*) = 6.312 mm-1, *T* = 150(2) K. 16910 unique reflections [*R*int = 0.067], 13360 with *I*>2(*I*). Final *R1* = 0.0407, *wR*2 (all data) = 0.102.

**1H NMR spectrum of free ligand in d-DMSO**

11.26ppm, singlet, 1H, 8.55 ppm, doublet, 1H J=5.0 Hz, 8.14ppm, singlet, 1H, 7.99ppm, doublet, 1H J= 8.0 Hz, 7.81ppm, multiplet, 3H, 7.37ppm, doublet, 1H J=8.0 Hz, 7.26ppm, triplet, 1H J=6.1 Hz

**Mass spec results for [Ni2L2](BF4)4:**

Electrospray: m/z 901 [Ni2L2-3H]+ m/z 989 [Ni2L2-3H][BF4]+, m/z 451 [Ni2L2-2H]2+ Note - isotope profiles support the formula [Ni2L2]2+ rather than [NiL]+
